1 Title: The trade-off between color and size in lizards' conspicuous tails

2

3 Running title: Color and size of lizards' tails

4

5 Authors: Raiane dos Santos Guidi<sup>a</sup>, Vinicius de Avelar São-Pedro<sup>a,b</sup>, Holda Ramos da  
6 Silva<sup>a</sup>, Gabriel Correa Costa<sup>c</sup>, Daniel Marques Almeida Pessoa<sup>a\*</sup>

7 <sup>a</sup> Laboratory of Sensory Ecology, Department of Physiology & Behavior, Federal  
8 University of Rio Grande do Norte, Natal, RN, Brazil

9 <sup>b</sup> Center of Natural Sciences, Federal University of São Carlos - *Campus* Lagoa do Sino,  
10 Buri, SP, Brazil

11 <sup>c</sup> Department of Biology and Environmental Sciences, Auburn University at  
12 Montgomery, Montgomery, AL, USA

13 \*Corresponding author: Daniel Marques Almeida Pessoa. DFS – CB, UFRN. Avenida  
14 Senador Salgado Filho, s/n. Campus Universitario Lagoa Nova. Bairro Lagoa Nova.  
15 Natal – RN, Brazil. 59078-970. E-mail: [pessoadma@cb.ufrn.br](mailto:pessoadma@cb.ufrn.br)

16

17

18 Declarations of interest: none.

19

20

21 Highlights

22 1) The roles of blue and red tails as decoys were not corroborated.

23 2) Tail color and size interact while influencing predation rates.

24 3) Larger red-tailed lizards are more prone to be attacked by birds.

25 4) The benefit of having conspicuous tails appears to decrease as body size increases.

26 Abstract

27 A tail of conspicuous coloration is hypothesized to be an advantageous trait for many  
28 species of lizards. Predator attacks would be directed to a non-vital, and autotomizable,  
29 body part, increasing the chance of survival. However, as body size increases it also  
30 increases the signaling area that could attract predators from greater distances, increasing  
31 the overall chance of predation. Here, we test the hypothesis that there is a trade-off  
32 between tail color and size, affecting predation probabilities. We used plasticine replicas  
33 of lizards to study the predation patterns of small and large lizards with red and blue tails.  
34 In a natural environment, we exposed six hundred replicas subjected to the attack of free-  
35 ranging predators. Large red-tailed models were attacked more quickly, and more  
36 intensely, by birds. Mammals and unidentified predators showed no preference for any  
37 size or colors. The attacks were not primarily directed to conspicuous tails when  
38 compared to the body or the head of our replicas. Our study suggests that red color signals  
39 in large lizards could enhance their detection by visually oriented predators (i.e., birds).  
40 The efficacy of conspicuous tails as a decoy may rely on associated behavioral displays,  
41 which are hard to test with static replicas.

42

43 Keywords: Chromatic contrast, Color vision, Predator-prey interaction, Prey size, Tail  
44 autotomy.

45

46

47

48

49

50

51 1. Introduction

52 Over evolutionary history, prey has developed several defense strategies to  
53 maximize survival rates in encounters with predators (Dawkins and Krebs, 1979).  
54 Predators play a strong evolutionary pressure over preys modifying their phenotypes  
55 (Castilla et al., 1999; Losos et al., 2004). In lizards, some of these strategies include  
56 escaping (Cooper, 2003; Hawlena, 2009; Schall and Pianka, 1980), deimatic behavior  
57 (Sherbrooke and Middendorf, 2001; Shine, 1990), morphological adaptations (Losos et  
58 al., 2002), tail autotomization (Bateman and Fleming, 2009), and cryptic or conspicuous  
59 color patterns (Fresnillo et al., 2015a; Stuart-Fox et al., 2004). Frequently, the same lizard  
60 species can combine two or more of these strategies in its predator avoidance repertoire  
61 (Pianka & Vitt, 2003; McElroy, 2019).

62 The use of color patterns as a defense strategy includes cryptic coloration, which  
63 conveys camouflage against dull backgrounds, decreasing the probability of detection by  
64 predators (Macedonia et al., 2004; Stuart-Fox et al., 2004). In contrast, conspicuous  
65 coloration can be used to frighten (Badiane et al., 2018) and discourage (Hasson, 1991)  
66 predators, or to redirect attacks to a non-vital region of the prey's body, usually the tail  
67 (Bateman et al., 2014; Castilla et al., 1999; Fresnillo et al., 2015a; Murali and  
68 Kodandamaraiah, 2016; Ortega et al., 2014; Watson et al., 2012; Wilkinson, 2003). Such  
69 redirection can occur by distinct mechanisms, depending on whether the conspicuous  
70 coloration is related to a longitudinal striped body (Murali and Kodandamaraiah, 2016,  
71 2017) or a colorful tail (Bateman et al., 2014; Fresnillo et al., 2015a).

72 Many lizard species from several unrelated families have tails with conspicuous  
73 coloration, which may be blue, green, or red, in contrast to the usually cryptic body-color  
74 (Murali et al., 2018). Although there are alternative hypotheses to explain the evolution  
75 of conspicuous tails (see Belliure et al., 2018; Clark and Hall, 1970;), several studies

76 proposed that they can act as an effective decoy, directing predators' attacks to the tail  
77 (Bateman et al., 2014; Castilla et al., 1999; Fresnillo et al., 2015a; Nasri et al., 2018;  
78 Ortega et al., 2014; Watson et al., 2012). Murali et al. also (2018) found that colorful tails  
79 in lizards are associated with diurnal species, suggesting that this trait has been selected  
80 against visually oriented predators. Nonetheless, it is still unknown to what extent  
81 predator-based selection has driven the evolution of color variation in lizards (McElroy,  
82 2019).

83         Although conspicuous tails have received increasing attention in the last decades,  
84 there are still important questions to address on this topic. One of the most intriguing  
85 issues is the occurrence of this trait predominantly in small-bodied lizards (Pianka & Vitt,  
86 2003). Even in some moderate-sized species, colorful tails occur mostly in juveniles,  
87 fading as the lizard approaches the minimal size for sexual maturity, usually around 40  
88 mm of snout-to-vent length (Bateman et al., 2014; Castilla et al., 1999; Hawlena et al.,  
89 2006; Ortega et al., 2014). A possible explanation for this pattern links coloration to  
90 foraging mode, suggesting that colorful tails are only advantageous in juveniles due to  
91 their riskier behavior (Hawlena et al., 2006; Nasri et al., 2018). Such explanation does not  
92 consider that conspicuous tails persist in adult small-bodied lizard species (e.g.,  
93 *Micrablepharus* spp. and *Vanzosaura* spp.), however, despite ontogenetic changes in their  
94 behavior.

95         In this study, we present the results of predation experiments using lizard replicas  
96 placed in the field. Our main goals were to test 1) the effectiveness of different tail colors  
97 as decoy and 2) the possible trade-off between tail color and body size in predation  
98 avoidance. We hypothesize that there may be a trade-off between tail size and its use as  
99 a colorful decoy for predator attack. While colorful tails would be beneficial for small  
100 lizards, the increase in body (tail) size would enhance the range of the color signal,

101 potentially attracting more predators and becoming disadvantageous. We also  
102 hypothesize that tails reflecting longer wavelength colors (e.g., red) attract more predators  
103 than those exhibiting short wavelengths (e.g., blue), since shorter wavelengths suffer  
104 more Rayleigh scattering than longer wavelengths, being transmitted for shorter distances  
105 (Bradbury & Vehrencamp, 2011). On one hand, if the decoy hypothesis is correct, we  
106 expect that red-tailed and blue-tailed lizards will be attacked more frequently in the tail  
107 when compared to brown-tailed replicas. On the other hand, if the trade-off hypothesis is  
108 correct, large lizards with colorful tails (blue and red) should be more attacked than their  
109 smaller counterparts.

110

## 111 2. Material and methods

### 112 2.1 Lizard replicas

113 We hand-made a total of 600 lizard replicas from non-toxic white plasticine, in  
114 two different sizes, 300 large replicas (130 mm, total length) and 300 small replicas (60  
115 mm, total length). Replicas were coated with non-toxic paint to resemble some of the  
116 color patterns exhibited by lizards of the study region (Figure 1S). Therefore, all replicas  
117 had brown dorsum and black flanks, but varied in tail color, which could be conspicuous  
118 (blue or red) or cryptic (brown), giving us six different experimental treatments that  
119 varied in color and size: large blue-tailed replicas, small blue-tailed replicas, large red-  
120 tailed replicas, small red-tailed replicas, large brown-tailed replicas, and small brown-  
121 tailed replicas (Figure 1).

### 122 2.2 Predation experiments

123 Our research protocol was approved by the Ethics Committee on The Use of  
124 Animals of our institution (protocol 075/2015) and is following Brazilian law. It complies  
125 with ARRIVE guidelines and was carried out following the U.K. Animals (Scientific

126 Procedures) Act, 1986, and associated guidelines, EU Directive 2010/63/EU for animal  
127 experiments.

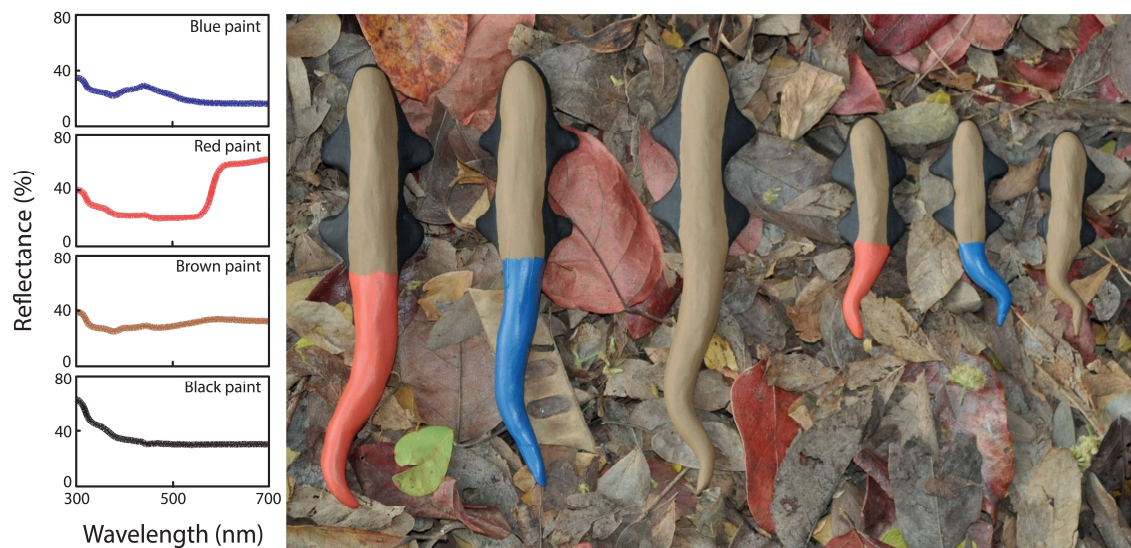

128 Figure 1. Six types of treatments used in our experiments. From left to right: large red-tailed replica, large  
129 blue-tailed replica, large brown-tailed replica, small red-tailed replica, small blue-tailed replica, and small  
130 brown-tailed replica. Small panels indicate the reflectance spectra of each kind of paint used to coat our  
131 replicas.

132

133 Field experiments were carried out in *Parque Estadual da Dunas* (5° 48' S; 35°  
134 11' W), an Atlantic Forest reserve located in Natal, the capital city of Rio Grande do  
135 Norte state, northeastern Brazil. Two small lizard species, with conspicuous tails, can be  
136 found in the state (Figure S1): the blue-tailed *Micrablepharus maximiliani* (Reinhardt and  
137 Lutken, 1861), which inhabits the very locality of the experiment, and the red-tailed  
138 *Vanzosaura multiscutata* (Amaral, 1933), that occurs in surrounding semiarid areas  
139 (Freire, 1996).

140

141 We conducted four repetitions of the same predation experiment, in 2017 (March,  
142 June, November) and 2018 (March). Each experiment consisted of placing 150 lizard  
142 replicas (25 of each experimental treatment) in the field for 20 days and recording  
143 predation marks left in the plasticine. Replicas were placed along a non-linear trail, at

144 every five-meter interval, in such a way that their position could be alternated between  
145 the trail's edge and forest interior (Figure S2). Replicas of different treatments were  
146 randomly assigned to each available position. Substrate did not vary along the trail and  
147 consisted of leaf litter over light brown sand. To prevent any predator from carrying the  
148 replicas away, each of them was attached to the nearest vegetation by a transparent fishing  
149 line, which was anchored to the bottom of the replica and remained hidden under the leaf  
150 litter.

151         Inspections for predation marks were made every two days. We recorded the  
152 following details if a replica had been attacked: to which treatment the attacked replica  
153 belonged; the type of mark left by the predator (bird peck, mammal bite, or unidentified  
154 predator); and in which body region the attack was launched (tail or body, which included  
155 head, trunk, and limbs). Marks left by ants (bite marks) were distinct and not counted as  
156 predator attacks (Shepard, 2007). Upon attack, replicas were removed from the field site  
157 and were not replaced, to avoid biased attacks made by accustomed predators (Marshal  
158 et al., 2015).

### 159 2.3 Spectrometry and visual modeling

160         To help us interpret the results of the experiment, we used visual modeling to  
161 understand how the main predators (i.e., birds) perceived the colors of replicas against  
162 the natural background. So, we measured the reflectance spectra (i.e., coloration) of each  
163 painted plasticine used to craft our replicas (Figure 1), as well as the reflectance spectra  
164 of the natural background (i.e., leaf litter), by using a USB4000-UV-VIS spectrometer  
165 (Ocean Optics Inc., Dunedin, Florida) connected to a laptop computer running software  
166 SpectraSuite (Ocean Optics Inc., Dunedin, Florida). Through a bifurcated QR450-7-XSR  
167 optic fiber (Ocean Optics Inc., Dunedin, Florida), the spectrometer was connected to a  
168 DH-2000-BAL light source (Ocean Optics Inc., Dunedin, Florida) and a probe.



169 Measurements were taken at a 45° angle and a constant distance of five millimeters from  
170 the tip of the probe. For calibration of our spectrometric system, we used a spectralon  
171 reflectance standard WS-1-SL (Ocean Optics Inc., Dunedin, Florida) as our white  
172 standard, and turned the light source off, obstructing the probe orifice with a black cloth,  
173 for determining our black standard. Spectra averaged to scan and boxcar were set at 10  
174 and 5, respectively.

175 The color difference between our replicas and the natural background was  
176 modeled using “pavo 2” (Maia et al., 2019), an R package. We ran receptor noise limited  
177 (RNL) models (Vorobyev et al., 1998), which gave us chromatic contrast values, in just  
178 noticeable difference (JND) units, between the reflectance spectra of our replicas and the  
179 leaf litter. Because the leaf litter at the experiment site consisted of leaves of varying  
180 colorations, we contrasted the coloration of our plasticine replicas (e.g., brown, black,  
181 blue, and red patches) with thirty-four different leaf litter measurements, and considered  
182 how the visual system of avian predators would discriminate replicas and background  
183 based on color alone.

184 There is a consolidated view that small deviations in receptor sensitivities do not  
185 affect model results significantly, it is, therefore, possible to use the spectral sensitivities  
186 of closely related species in models, if those of the species in focus are not known (Olsson  
187 et al. 2018). Since no information on the visual systems of native avian predators is  
188 available, we have employed blue tits’ (*Cyanistes caeruleus*) parameters in our visual  
189 model, which has been considered as a good proxy for passerine vision. The  
190 tetrachromatic vision of *Cyanistes caeruleus* counts with four classes of cones with  
191 different spectral sensitivities: ultraviolet sensitive cones (UV), blue-sensitive cones (S),  
192 green-sensitive cones (M) and red-sensitive cones (L). For calculation of absolute  
193 quantum catches for each of cone type we ran *vismodel*, from “pavo 2 package” (Maia et



194 al., 2019), with the following arguments: *visual* = “bluetit”; *achromatic* = “none”; *illum*  
195 = “forestshade”, since our experiments took place in an Atlantic Forest area; *trans* =  
196 “bluetit”; *qcatch* = “Q<sub>i</sub>”; *bkg* = “ideal”; *vonkries* = “false”; *scale* = “1”; *relative* = “false”.  
197 Chromatic contrasts between replicas and leaf litter were calculated by using *coldist*, from  
198 “pavo 2 package” (Maia et al., 2019), with the following arguments: *noise* = “neural”,  
199 since we were only interested in modeling color signals for strictly diurnal predators (e.g.,  
200 birds); *achromatic* = “false”; *n* = c(1,1.9,2.7,2.7), representing blue tits’ retinal relative  
201 proportion of photopigments (UV: 1.0; S: 1.9; M: 2.7; L: 2.7; Hart et al. 2000); *weber* =  
202 “0.1”; *weber.ref* = “longest”; *weber.achro* = “false”.

203 We classified the crypticity of our replicas’ patches according to the chromatic  
204 contrast they exhibited against the leaf litter. Following Siddiqi et al., (2004), we adopted  
205 three levels of detectability: cryptic ( $\Delta S < 1$  JND), poorly detectable ( $1 \text{ JND} \leq \Delta S \leq 3$   
206 JND) and detectable ( $\Delta S > 3$  JND). The higher the chromatic contrast, the higher the color  
207 difference between a replica and its surroundings, favoring their detectability.

#### 208 2.4 Statistical analyses

209 First, we generated Kaplan-Meier survival curves for each treatment and  
210 compared them using Log-rank (Mantel-Cox), Breslow (Generalized Wilcoxon), and  
211 Tarone-Ware tests. To check the frequency distribution of attacks between all six  
212 treatments, we used Pearson's chi-squared test. For survival analyses, replicas showing  
213 marks on the body and/or tail were considered as attacked ( $n = 223$ , from a total of 600  
214 replicas).

215 We also build generalized linear mixed-effects models with R package lme4 vs.  
216 1.1 (Bates et. al 2015) for testing whether attacks directed to the tail or body (response  
217 variable) were related to lizard size, tail color, or the interaction of size and color. Four  
218 different generalized linear mixed-effects models considered the attacks from 1) all

219 predators combined, 2) mammals, 3) birds, and 4) mammals and birds. Replicas'  
220 individual IDs were entered as a random factor.

221 We also compared the chromatic contrast between leaf litter and each replicas'  
222 colored patches, by running a Friedman test, with Wilcoxon *post-hoc*.

223

### 224 3. Results

#### 225 3.1 Behavioral data

226 Among all the 600 replicas placed in the field, 223 (37%) suffered some kind of  
227 predator attack. All six treatments were attacked at least once, and most of the replicas  
228 attacked were large blue-tailed ( $n = 46$ , 21%), small red-tailed ( $n = 41$ , 18%) and large  
229 red-tailed ( $n = 39$ , 17%) (Figure 2). Unidentified predators were responsible for 78% ( $n$   
230  $= 174$ ) of the attacks, followed by birds ( $n = 32$ , 14%) and mammals ( $n = 17$ , 8%).

231 Considering survival curves for the total number of replicas attacked (i.e., pooling  
232 data from all kinds of predators), we found no difference between treatments (Log-rank:  
233  $df = 5$ ,  $P = 0.08$  / Breslow:  $df = 5$ ,  $P = 0.12$  / Tarone-ware:  $df = 5$ ,  $P = 0.098$ ). The same  
234 was true for the number of replicas attacked by mammals alone (Log-rank:  $df = 5$ ,  $P =$   
235  $0.807$  / Breslow:  $df = 5$ ,  $P = 0.807$  / Tarone-ware:  $df = 5$ ,  $P = 0.808$ ) and by unidentified  
236 predators alone (Log-rank:  $df = 5$ ,  $P = 0.141$  / Breslow:  $df = 5$ ,  $P = 0.272$  / Tarone-ware:  
237  $df = 5$ ,  $P = 0.198$ ). However, large red-tailed replicas were significantly more attacked by  
238 birds, when compared to replicas of other treatments (Log-rank:  $df = 5$ ,  $P = 0.017$  /  
239 Breslow:  $df = 5$ ,  $P = 0.07$  / Tarone-ware:  $df = 5$ ,  $P = 0.01$ ) (Figure 3).

240 The frequency of attacks between the six treatments was marginally significant  
241 ( $\chi^2 = 24.57$ ,  $df = 15$ ,  $P = 0.056$ ). Values of adjusted residuals in the crosstab suggest that  
242 some frequencies are higher than expected by chance. More specifically, small brown-  
243 tailed replicas were less attacked than randomly expected (observed counts: 75; expected

244 counts: 62.8; adjusted values: 2.8), large blue-tailed replicas suffered more unidentified  
245 attacks than expected (observed counts: 38; expected counts: 29; adjusted values: 2.2),  
246 while large red-tailed ones suffered more bird attacks than expected (observed counts:  
247 12; expected counts: 5.3; adjusted values: 3.3) (Table S1).

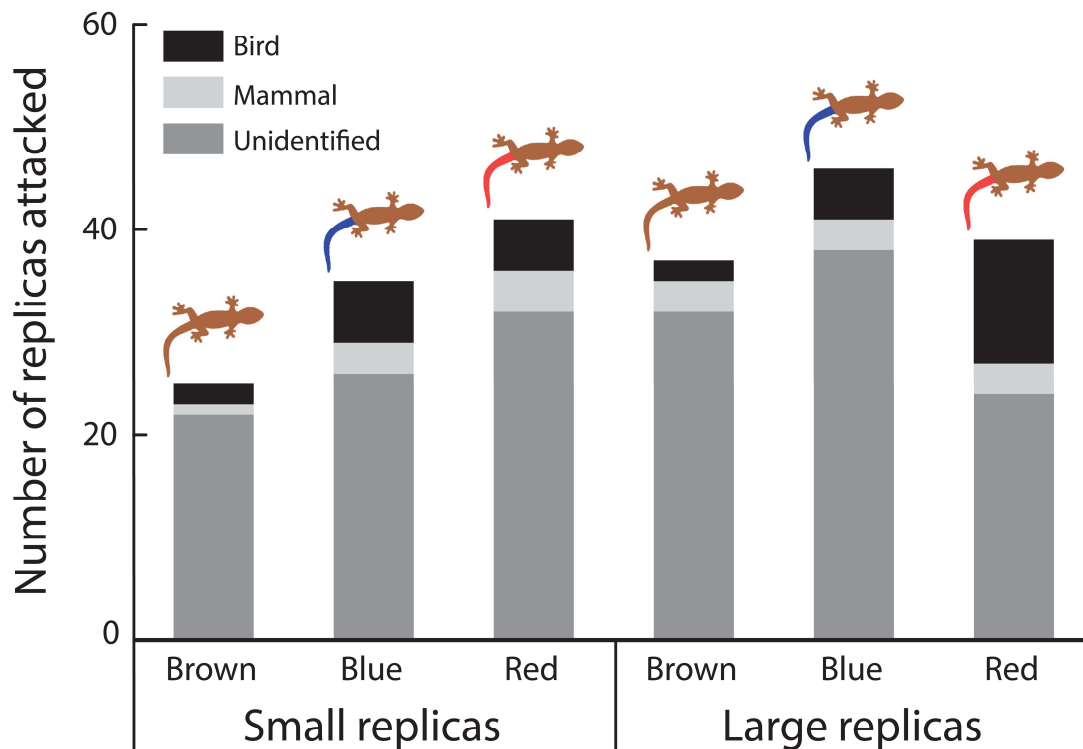

248 Figure 2. Number of attacks suffered by replicas of each treatment. Data from four repetitions are pooled.

249 Total number of replicas used = 600.

250

251 Regarding our generalized linear mixed-effects models, that accessed the  
252 frequency of attacks directed to the tail or the body, we found no significant effect (Table  
253 S2) of color ( $p > 0.05$ ), size ( $p > 0.05$ ), or any interaction between these variables ( $p >$   
254  $0.05$ ). These results were consistent when we analyzed attacks performed by all kinds of  
255 predators, only by mammals, only by birds, and the attacks performed by mammals and  
256 birds (i.e., disregarding unidentified predators).

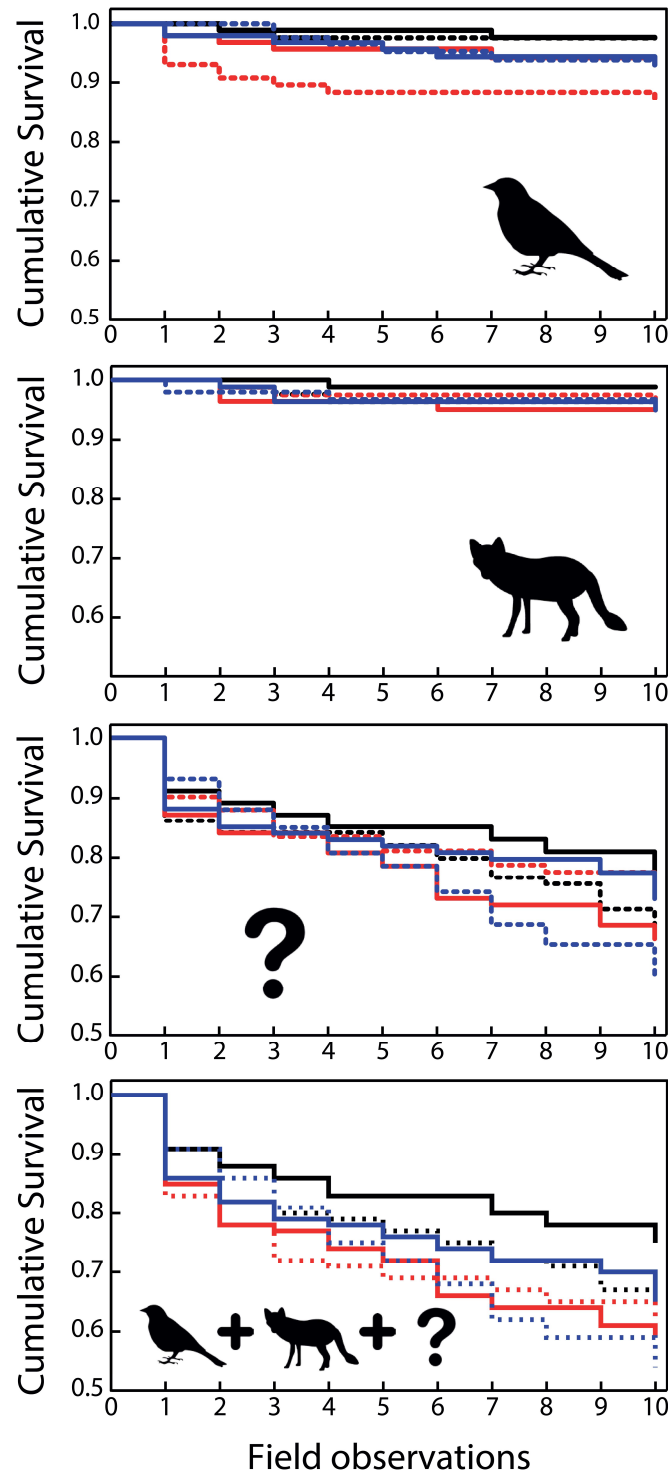

257 Figure 3. Kaplan-Meier survival plots for attacks performed by birds, mammals, unidentified predators  
258 (indicated by a “?” sign), and all kinds of predators pooled. Different treatments are indicated by different  
259 lines: small brown-tailed replicas = black solid line; large brown-tailed replicas = black dashed line; small  
260 red-tailed replicas = red solid line; large red-tailed replicas = red dashed line; small blue-tailed replicas =  
261 blue solid line; large blue-tailed replicas = blue dashed line. Data from four repetitions are pooled. Each

262 repetition consisted of ten field observations, conducted throughout twenty experimental days. Total  
263 number of replicas used = 600.

264

### 265 3.2 Visual modeling

266 Our visual model showed that, for visually-driven predators, such as passerines,  
267 every replicas' body patches were expected to be detectable against the leaf litter (i.e.,  $\Delta S$   
268  $> 3$  JND) (Figure 4). Blue and red tails were predicted to show equivalent levels of  
269 conspicuity ( $Z = -0.299$ ,  $P = 0.765$ ), although blue tails were predicted to be the most  
270 conspicuous of all body parts, contrasting significantly more from the leaf litter when  
271 compared to more cryptic body regions, such as black flanks ( $Z = -5.086$ ,  $P < 0.0001$ ) and  
272 brown dorsum/tails ( $Z = -5.086$ ,  $P < 0.001$ ). Red tails' conspicuity was predicted to match  
273 that of black flanks ( $Z = -1.479$ ,  $P = 0.139$ ), and to differ from brown dorsum/tails'  
274 chromatic contrast values ( $Z = -5.086$ ,  $P < 0.0001$ ). Brown dorsum/tails were also  
275 predicted to be more cryptic than black flanks ( $Z = -4.283$ ,  $P < 0.0001$ ).

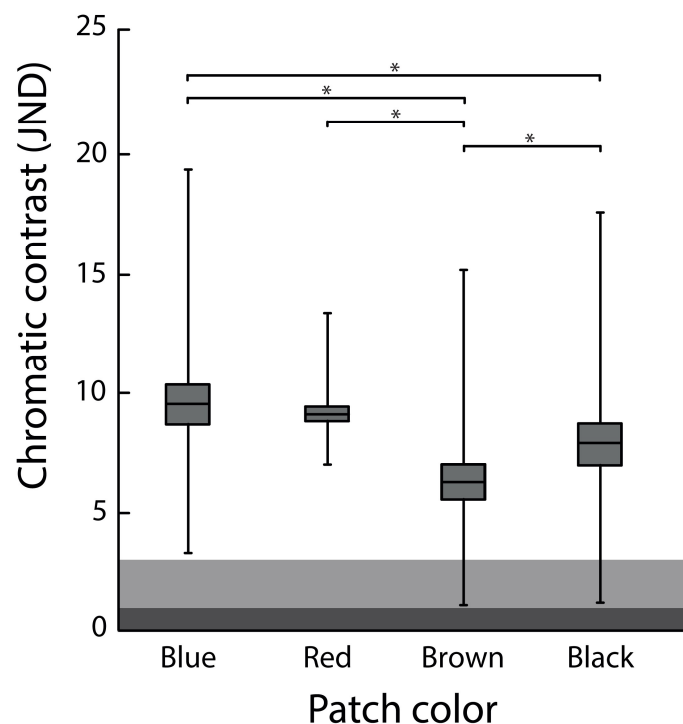

276 Figure 4. Chromatic contrast ( $\Delta S$ ) between replicas' body patches (i.e., blue tail, red tail, brown tail/dorsum,  
277 and black flank) and leaf litter, according to the visual system of avian predators. Mean values are indicated

278 by central horizontal black lines, SEM is limited by the boxes, while maximum and minimum values are  
279 indicated by whiskers. Detection thresholds are indicated by areas of different colors: the dark grey area  
280 refers to situations in which  $\Delta S < 1$  JND, the light grey area illustrates situations in which  $1 \text{ JND} \leq \Delta S \leq 3$   
281 JND, while the white area indicates situations in which  $\Delta S > 3$  JND.

282

#### 283 4. Discussion

284         Some of our results corroborate the hypothesis that there is a survival trade-off  
285 between body size and tail color in lizards. Although the results of our generalized linear  
286 mixed-effects were unable to indicate any effect of color or size on the frequency of  
287 attacks directed to replicas' tails or body region, the hypothesis was supported by data  
288 from our survival analysis curves. Large red-tailed replicas were more frequently and  
289 rapidly attacked by birds than all other treatments, suggesting greater conspicuity of this  
290 kind of prey to visually oriented predators. Most birds are not just visually oriented but  
291 also rely primarily on color vision while foraging (Sherry, 2016). According to our visual  
292 model, birds should segregate blue and red tails from the background with the same  
293 aptitude. However, it is important to state that our visual model only took into  
294 consideration how a theoretical passerine visual system, under ideal conditions, would  
295 discriminate two objects based on color alone. Under field conditions many additional  
296 variables (e.g., outline, texture, brightness, glossiness, movement) gain importance in  
297 explaining the detection of colored targets, so modeling predictions only takes us to a  
298 certain point.

299         Although our visual model predicts blue and red tails to be equally conspicuous  
300 to birds, our behavioral data failed to confirm this prediction and showed, for example,  
301 large blue tails to be more cryptic than large red ones. This disparity between our  
302 theoretical predictions and our behavioral data might be, at least, partially explained  
303 through the effect of Rayleigh scattering, which disperses shorter electromagnetic waves

304 through the air (e.g., blue color) more intensely than longer electromagnetic waves (e.g.,  
305 red color), in such a way that blue signals tend to attenuate more vigorously and cannot  
306 be easily perceived at greater distances (Bradbury & Vehrencamp, 2011). Conversely,  
307 red signals travel longer distances and, consequently, might attract more predators, as  
308 shown by our predation experiment. When compared to smaller replicas, larger replicas  
309 produce stronger color signals, capable of enduring more attenuation, and propagating to  
310 longer distances. As birds take advantage of flight and perching on branches to scan the  
311 landscape for prey (Sherry, 2016), they are the predators that benefit most from long-  
312 distance signals. Birds are the most important predators of small to moderate-sized lizards  
313 and exert strong selective pressure on them (Pianka & Vitt, 2003), reinforcing the  
314 importance of such trade-offs in the evolutionary history of this group.

315         On one hand, our survival trade-off hypothesis seems to be adequate to explain  
316 the predominance of red tails in small lizards, since our results presume a size threshold  
317 from which having a red tail becomes more disadvantageous. On the other hand, our  
318 predation experiment showed that blue-tailed replicas were equally attacked by birds,  
319 regardless of body size, which does not explain the prevalence of blue-tailed lizards in  
320 small-bodied species. So, a still unanswered question is why blue tails do not persist in  
321 adult lizards of moderate sizes (e.g., several species of the family Scincidae). Pianka and  
322 Vitt (2003) hypothesized that these larger species lose their flashy tails to avoid the need  
323 for autotomy during adulthood when all energy must be saved to be used during the sparse  
324 reproduction episodes. In contrast, because tiny species, generally, produce more clutches  
325 per year, spending energy on regenerating a lost tail would not compromise much of their  
326 reproductive success (Pianka & Vitt, 2003). Yet, the same explanation might be applied  
327 to tails of other colors, including red tails. These hypotheses, as well as others mentioned  
328 before [e.g., increased movement hypothesis (Hawlena, 2009); aggression avoidance



329 hypothesis (Fresnillo et al., 2015b)], are not mutually exclusive. None of these hypotheses  
330 alone seem to explain the occurrence of colorful tails in all their natural variation of size  
331 and colors. Only a more comprehensive work, which compiles the results of experimental  
332 studies and data on life-history traits of most lizard species with brightly colored tails,  
333 can elucidate the relative contribution of the mechanisms proposed in each hypothesis  
334 and the cases where they may have acted in synergy.

335         We did not find support for the hypothesis that conspicuous tails serve as decoys  
336 for predators. Our result contradicts similar studies with lizard replicas that endorse the  
337 efficacy of blue (Bateman et al., 2014; Watson et al., 2012), red (Fresnillo et al., 2015;  
338 Nasri et al., 2018), and green (Castilla et al., 1999) colors in redirecting predator attacks  
339 towards the tail. A possible explanation for that could be related to the type of predators  
340 recorded in each study. Most of these previous experiments based their conclusions on  
341 avian attacks solely and were conducted in temperate regions. In our study, conducted in  
342 a tropical forest site, even when we restricted our analyses to bird attacks, we found no  
343 preference for body or tail. We are aware that color itself may be not enough to redirect  
344 predators' attacks to the tail. Indeed, several studies have suggested the importance of tail  
345 displays (e.g., lashing, wagging, waving) combined with conspicuous colors to  
346 effectively attract predator's attention (Cooper & Vitt, 1985; Hawlena, 2009; Nasri et al.,  
347 2018). Despite the success of previous studies that used static replicas to corroborate the  
348 decoy hypothesis, we believe that movement stimuli can be decisive to direct the attack  
349 of some predators (Paluh et al., 2014). Perhaps our study did not corroborate this  
350 hypothesis because in our study area, unlike previous studies, there is a predominance of  
351 predators that depend on tail displays to unleash their attacks.

352         Regardless of inherent limitations, clay model experiments have proven to be an  
353 important tool for investigating predator-prey interactions (Bateman et al., 2017). While

354 replicas seem to be convincing for birds (Paluh et al., 2015), there are still many doubts  
355 about their efficiency for other types of predators, such as mammals, snakes, and  
356 invertebrates, that might end-up prioritizing the use of non-visual sensory modalities  
357 when searching for prey. Indeed, in our experiment, unidentified predators accounted for  
358 most of the attacks (78%). These indistinct marks were likely left by arthropods, which  
359 are foragers mostly oriented by chemotactile cues (Greenfield, 2002). In this case, the  
360 damages in the replicas were randomly caused and their predominance in the body would  
361 be merely due to the greater volume of that part compared to the tail. To avoid  
362 misinterpretations, Bateman et al., (2017) recommend caution when attributing  
363 unidentified marks in clay replicas to predator attacks. Nevertheless, further  
364 investigations should be encouraged, to evaluate how replicas that mimic prey's color and  
365 shape are effective in attracting predators and eliciting their response. Particularly,  
366 because it may be possible that non-avian predators have been underestimated by  
367 literature.

368

## 369 5. Conclusion

370 Here, we have experimentally shown, for the first time, the interaction of two  
371 important lizard morphological variables (color pattern and body size) as a predator  
372 avoidance strategy. Despite failing to confirm the effectiveness of conspicuous tails as  
373 decoys our experiment succeeded to show how a color signal that is beneficial for small-  
374 bodied and/or juvenile lizards may become disadvantageous for a larger-bodied and/or  
375 adult animal. Conspicuous tails have evolved independently, multiple times, among  
376 different groups of lizards (Murali et al., 2018). Understanding the evolutionary forces  
377 behind this amazing morphological trait, and its nuances, can be enlightening, not just for  
378 the study of lizards, but also for the understanding of predation ecology in general.

379

## 380 6. Acknowledgements

381 This study was financed in part by the Coordenacao de Aperfeicoamento de Pessoal de  
382 Nivel Superior – Brazil (CAPES) [Finance Codes 001 and 043/2012], which also  
383 provided a Post-Doc Scholarship to V.A.S.P.; and by Conselho Nacional de  
384 Desenvolvimento Cientifico e Tecnologico – Brazil (CNPQ) [Finance Codes  
385 478222/2006-8, 25674/2009 and 474392/2013-9], that also granted two Scientific  
386 Initiation Scholarships for Undergraduate Students (R.S.G. and H.R.S.), as well as two  
387 Researcher Scholarships, to G.C.C. and D.M.A.P. We are also grateful to E. Oliveira,  
388 M.F. Erickson, S.C. Schirmer, G. Grimaldi, D.J.A. Silva, J.B.C. Neto, G. Mesquita, and  
389 R.T. M. Sales for helping with replicas’ crafting and field assistance; to IDEMA-RN  
390 (Nucleo de Gestao de Unidades de Conservacao) for allowing our research to be carried  
391 out in Parque Estadual das Dunas (Natal - RN); and to W. Silva for kindly providing the  
392 photos used in our Supplementary Material.

393

## 394 7. References

- 395 Badiane, A., Carazo, P., Price-Rees, S.J., Ferrando-Bernal, M., & Whiting, M.J., 2018.  
396 Why blue tongue? A potential UV-based deimatic display in a lizard. *Behav. Ecol.*  
397 *Sociobiol.* 72(7), 104. <https://doi.org/10.1007/s00265-018-2512-8>
- 398 Bateman, P.W., Fleming, P.A., 2009. To cut a long tail short: A review of lizard caudal  
399 autotomy studies carried out over the last 20 years. *J. Zool.* 277, 1–14.  
400 <https://doi.org/10.1111/j.1469-7998.2008.00484.x>
- 401 Bateman, P.W., Fleming, P.A., Rolek, B., 2014. Bite me: Blue tails as a “risky-decoy”  
402 defense tactic for lizards. *Curr. Zool.* 60, 333–337.  
403 <https://doi.org/10.1093/czoolo/60.3.333>

- 404 Bateman, P.W., Fleming, P.A., Wolfe, A.K., 2017. A different kind of ecological  
405 modelling: the use of clay model organisms to explore predator–prey interactions in  
406 vertebrates. *J. Zool.* 301, 251–262. <https://doi.org/10.1111/jzo.12415>
- 407 Bates, D.M.M., Bolker, B., Walker, S., 2015. Fitting Linear Mixed-Effects Models Using  
408 lme4. *J. Stat. Softw.* 67(1), 1-48. <https://doi.org/10.18637/jss.v067.i01>.
- 409 Belliure, J., Fresnillo, B., Cuervo, J.J., 2018. Male mate choice based on female coloration  
410 in a lizard: The role of a juvenile trait. *Behav. Ecol.* 29, 543–552.  
411 <https://doi.org/10.1093/beheco/ary005>
- 412 Bradbury, J.W., Vehrencamp, S.L., 2011. *Principles of Animal Communication*. 2nd.  
413 Sinauer Associates, Sunderland, Massachusetts.
- 414 Castilla, A.M., Gosá, A., Galán, P., Pérez-Mellado, V., 1999. Green tails in lizards of the  
415 genus *Podarcis*: Do they influence the intensity of predation? *Herpetologica*. 55, 530–  
416 537.
- 417 Clark, D.R. Jr & Hall, R.J., 1970. Function of the blue tail-col- oration of the five-lined  
418 skink (*Eumeces fasciatus*). *Herpetologica*. 26: 271–274.
- 419 Cooper, W.E. & Vitt, L.J., 1985. Blue tails and autotomy: enhancement of predation  
420 avoidance in juvenile skinks. *Ethology*. 70: 265-276. [https://doi.org/10.1111/j.1439-](https://doi.org/10.1111/j.1439-0310.1985.tb00518.x)  
421 [0310.1985.tb00518.x](https://doi.org/10.1111/j.1439-0310.1985.tb00518.x)
- 422 Cooper, W.E., 2003. Effect of risk on aspects of escape behavior by a lizard, *Holbrookia*  
423 *propinqua*, in relation to optimal escape theory. *Ethology*. 109, 617–626.  
424 <https://doi.org/10.1046/j.1439-0310.2003.00912.x>
- 425 Dawkins, R., Krebs, J.R., 1979. Arms Races between and within Species. *Proc. R. Soc.*  
426 *B Biol. Sci.* 205, 489–511. <https://doi.org/doi:10.1098/rspb.1979.0081>
- 427 Freire, E.M.X., 1996. Estudo ecológico e zoogeográfico sobre a fauna de lagartos (Sauria)  
428 das dunas de Natal, Rio Grande do Norte e da restinga de Ponta de Campina, Cabedelo,

- 429 Paraíba, Brasil. *Rev. Bras. Zool.* 13(4), pp. 903-921. <https://doi.org/10.1590/S0101->  
430 [81751996000400012](https://doi.org/10.1590/S0101-81751996000400012)
- 431 Fresnillo, B., Belliure, J., Cuervo, J.J., 2015a. Red tails are effective decoys for avian  
432 predators. *Evol. Ecol.* 29, 123–135. <https://doi.org/10.1007/s10682-014-9739-2>
- 433 Fresnillo, B., Belliure, J., Cuervo, J.J., 2015b. Red coloration in juvenile spiny-footed  
434 lizards, *Acanthodactylus erythrurus*, reduces adult aggression. *Anim. Behav.* 102, 59–  
435 67. <https://doi.org/10.1016/j.anbehav.2015.01.004>
- 436 Greenfield, M.D., 2002. Signalers and receivers - Mechanisms and evolution of arthropod  
437 communication. Oxford University Press, New York
- 438 Hart, N.S., Partridge, J.C., Cuthill, I.C., Bennett, A.T., 2000. Visual pigments, oil  
439 droplets, ocular media and cone photoreceptor distribution in two species of passerine  
440 bird: the blue tit (*Parus caeruleus* L.) and the blackbird (*Turdus merula* L.). *J. Comp.*  
441 *Physiol. A.* 186, 375–87. <https://doi.org/10.1007/s003590050437>
- 442 Hasson, O., 1991. Pursuit-deterrent signals: Communication between prey and predator.  
443 *Trends Ecol. Evol.* 6, 325-29. [https://doi.org/10.1016/0169-5347\(91\)90040-5](https://doi.org/10.1016/0169-5347(91)90040-5)
- 444 Hawlena, D., Bochnik, R., Abramsky, Z., Bouskila, A., 2006. Blue tail and striped body:  
445 Why do lizards change their infant costume when growing up? *Behav. Ecol.* 17, 889–  
446 896. <https://doi.org/10.1093/beheco/arl023>
- 447 Hawlena, D., 2009. Colorful tails fade when lizards adopt less risky behaviors. *Behav.*  
448 *Ecol. Sociobiol.* 64, 205–213. <https://doi.org/10.1007/s00265-009-0837-z>
- 449 Losos, J.B., Mouton, P.L.F.N., Bickel, R., Cornelius, I., & Ruddock, L., 2002. The effect  
450 of body armature on escape behaviour in cordylid lizards. *Anim. Behav.* 64(2), 313-  
451 321. <https://doi.org/10.1006/anbe.2002.3051>

- 452 Losos, J.B., Schoener, T.W., Spiller, D.A. 2004. Predator-induced behaviour shifts and  
453 natural selection in field-experimental lizard populations. *Nature*. 432, 505–508.  
454 <https://doi.org/10.1038/nature03039>
- 455 Macedonia, J.M., Husak, J.F., Brandt, Y.M., Lappin, A.K., Baird, T.A., 2004. Sexual  
456 Dichromatism and Color Conspicuousness in Three Populations of Collared Lizards  
457 (*Crotaphytus collaris*) from Oklahoma. *J. Herpetol.* 38, 340–354.  
458 <https://doi.org/10.1670/183-03A>
- 459 Maia, R., Gruson, H., Endler, J.A., & White, T.E., 2019. Pavo 2: New tools for the  
460 spectral and spatial analysis of colour in R. *Methods Ecol. Evol.* 10, 1097-1107.  
461 <https://doi.org/10.1111/2041-210X.13174>
- 462 Marshall, K.L., Philpot, K.E., & Stevens, M., 2015. Conspicuous male coloration impairs  
463 survival against avian predators in Aegean wall lizards, *Podarcis erhardii*. *Ecol. Evol.*  
464 5(18), 4115-4131. <https://doi.org/10.1002/ece3.1650>
- 465 McElroy, E.J., 2019. Antipredator behavioral mechanisms: Avoidance, Deterrence,  
466 Escaping and Encounter, in: Bels, V., & Russell, A. (Eds.), *Behavior of Lizards:*  
467 *Evolutionary and Mechanistic Perspectives*. CRC Press, Boca Raton pp. 107-142.
- 468 Murali, G. & Kodandaramaiah, U., 2016. Deceived by stripes: conspicuous patterning on  
469 vital anterior body parts can redirect predatory strikes to expendable posterior organs.  
470 *R. Soc. Open Sci.* 3(6), 160057. <https://doi.org/10.1098/rsos.160057>
- 471 Murali, G., Kodandaramaiah, U., 2017. Body size and evolution of motion dazzle  
472 coloration in lizards. *Behav. Ecol.* 29, 79–86. <https://doi.org/10.1093/beheco/axx128>
- 473 Murali, G., Merilaita, S., Kodandaramaiah, U., 2018. Grab my tail: evolution of dazzle  
474 stripes and colourful tails in lizards. *J. Evol. Biol.* 31, 1675–1688.  
475 <https://doi.org/10.1111/jeb.13364>

- 476 Nasri, I., Hamza, F., Belliure, J., Selmi, S., 2018. Tail conspicuousness and antipredatory  
477 behaviour in Bosk's fringe-toed lizard (*Acanthodactylus boskianus*). *Ethol. Ecol. Evol.*  
478 30, 319–330. <https://doi.org/10.1080/03949370.2017.1402091>
- 479 Olsson, P., Lind, O., Kelber, A., 2018. Chromatic and achromatic vision: parameter  
480 choice and limitations for reliable model predictions. *Behav. Ecol.* 29, 273–282.  
481 <https://doi.org/10.1093/beheco/arx133>
- 482 Ortega, J., López, P., Martín, J., 2014. Conspicuous blue tails, dorsal pattern morphs and  
483 escape behaviour in hatchling Iberian wall lizards (*Podarcis hispanicus*). *Biol. J. Linn.*  
484 Soc. 113, 1094–1106. <https://doi.org/10.1111/bij.12379>
- 485 Paluh, D.J., Hantak, M.M., Saporito, R.A., 2014. A Test of Aposematism in the  
486 Dendrobatid Poison Frog *Oophaga pumilio*: The Importance of Movement in Clay  
487 Model Experiments. *J. Herpetol.* 48, 249–254. <https://doi.org/10.1670/13-027>
- 488 Paluh, D.J., Kenison, E.K., & Saporito, R.A., 2015. Frog or fruit? The importance of color  
489 and shape to bird predators in clay model experiments. *Copeia*, 2015(1), 58-63  
490 <https://doi.org/10.1643/CE-13-126>
- 491 Pianka, E.R., & Vitt, L.J., 2003. *Lizards: windows to the evolution of diversity* (Vol. 5),  
492 First ed. University of California Press, Berkeley.
- 493 Schall, J.J., Pianka, E.R., 1980. Evolution of Escape Behavior Diversity. *Source Am. Nat.*  
494 115, 551–566. <https://doi.org/10.1086/283579>
- 495 Shepard, D.B., 2007. Habitat but not body shape affects predator attack frequency on  
496 lizard models in the Brazilian Cerrado. *Herpetologica.* 63(2), pp.193-202.  
497 [https://doi.org/10.1655/0018-0831\(2007\)63\[193:HBNBSA\]2.0.CO;2](https://doi.org/10.1655/0018-0831(2007)63[193:HBNBSA]2.0.CO;2)
- 498 Sherbrooke, W.C., & Middendorf III, G.A., 2001. Blood-squirting variability in horned  
499 lizards (*Phrynosoma*). *Copeia.* 2001(4), 1114-1122. [https://doi.org/10.1643/0045-](https://doi.org/10.1643/0045-8511(2001)001[1114:BSVIHL]2.0.CO;2)  
500 [8511\(2001\)001\[1114:BSVIHL\]2.0.CO;2](https://doi.org/10.1643/0045-8511(2001)001[1114:BSVIHL]2.0.CO;2)



- 501 Sherry, T.W., 2016. Avian food and foraging, in: Lovette, I.J. & Fitzpatrick, J.W. (Eds.),  
502 Handbook of Bird Biology. John Wiley & Sons, Hoboken, pp. 265-310.
- 503 Shine, R., 1990. Function and evolution of the frill of the frillneck lizard,  
504 *Chlamydosaurus kingii* (Sauria: Agamidae). Biol. J. Linn. Soc. 40(1), 11-20.  
505 <https://doi.org/10.1111/j.1095-8312.1990.tb00531.x>
- 506 Siddiqi, A., Cronin, T.W., Loew, E.R., Vorobyev, M., Summers, K., 2004. Interspecific  
507 and intraspecific views of color signals in the strawberry poison frog *Dendrobates*  
508 *pumilio*. J. Exp. Biol. 207, 2471-2485. <https://doi.org/10.1242/jeb.01047>
- 509 Stuart-Fox, D.M., Moussalli, A., Johnston, G.R., & Owens, I.P., 2004. Evolution of color  
510 variation in dragon lizards: quantitative tests of the role of crypsis and local adaptation.  
511 Evolution. 58(7), 1549-1559. <https://doi.org/10.1111/j.0014-3820.2004.tb01735.x>
- 512 Vorobyev, M., Osorio, D., Bennett, A.T., Marshall, N.J., Cuthill, I.C., 1998.  
513 Tetrachromacy, Oil Droplets and Bird Plumage Colours. J. Comp. Physiol. A. 183(5),  
514 621–633. <https://doi.org/doi:10.1007/s003590050286>
- 515 Watson, C.M., Roelke, C.E., Pasichnyk, P.N., Cox, C.L., 2012. The fitness consequences  
516 of the autotomous blue tail in lizards: An empirical test of predator response using clay  
517 models. Zoology. 115, 339–344. <https://doi.org/10.1016/j.zool.2012.04.001>
- 518 Wilkinson, M.H.F., 2003. Decoys in Predation and Parasitism. Comments Theor. Biol.  
519 8, 321–338.
