# Supplementary material for: The trade-off between color and size in lizards’ conspicuous tails
Source: bioRxiv or medRxiv preprint supplement (doi:10.1101/2021.03.29.437563), 2021-03-30
Supplement: Supplementary file [file media-1.pdf]

## Supplementary material

Guidi, R.S., São-Pedro, V.A., Da Silva, H.R., Costa, G.C., Pessoa, D.M.A., 2021. The trade-off between color and size in lizards' conspicuous tails. *Biorxiv - Animal Behavior and Cognition*.

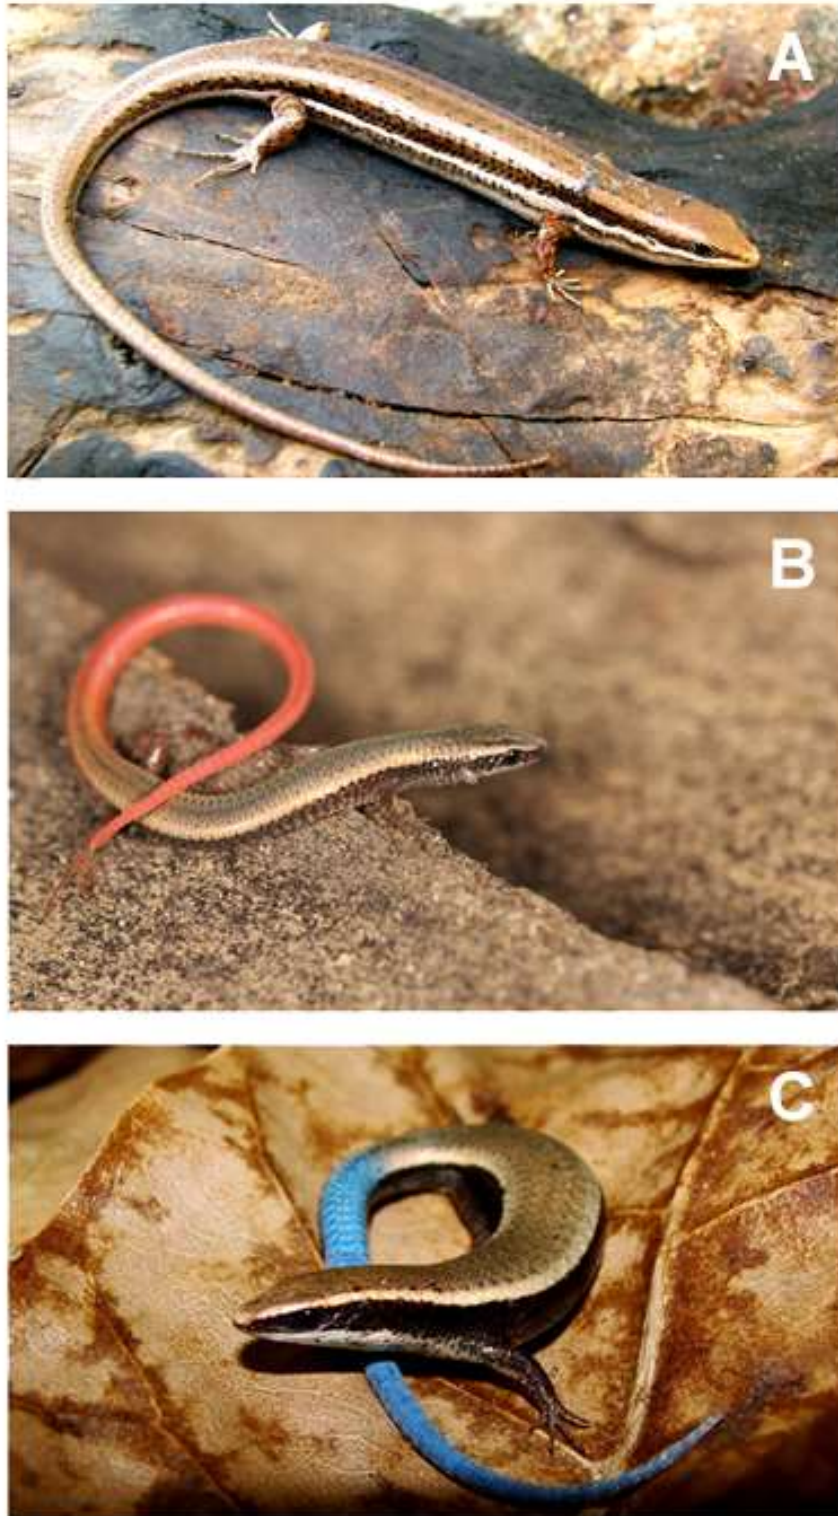

Figure S1. Lizard species that inspired us to create our replicas. A) *Brasiliscincus heathi*, showing a brown tail (Photo: Vinicius São-Pedro); B) *Vanzosaura multiscutata*, exhibiting a red tail (Photo: Willianilson Silva); and C) *Micrablepharus maximiliani* displaying a blue tail (Photos: Willianilson Silva).

## Supplementary material

Guidi, R.S., São-Pedro, V.A., Da Silva, H.R., Costa, G.C., Pessoa, D.M.A., 2021. The trade-off between color and size in lizards' conspicuous tails. *Biorxiv - Animal Behavior and Cognition*.

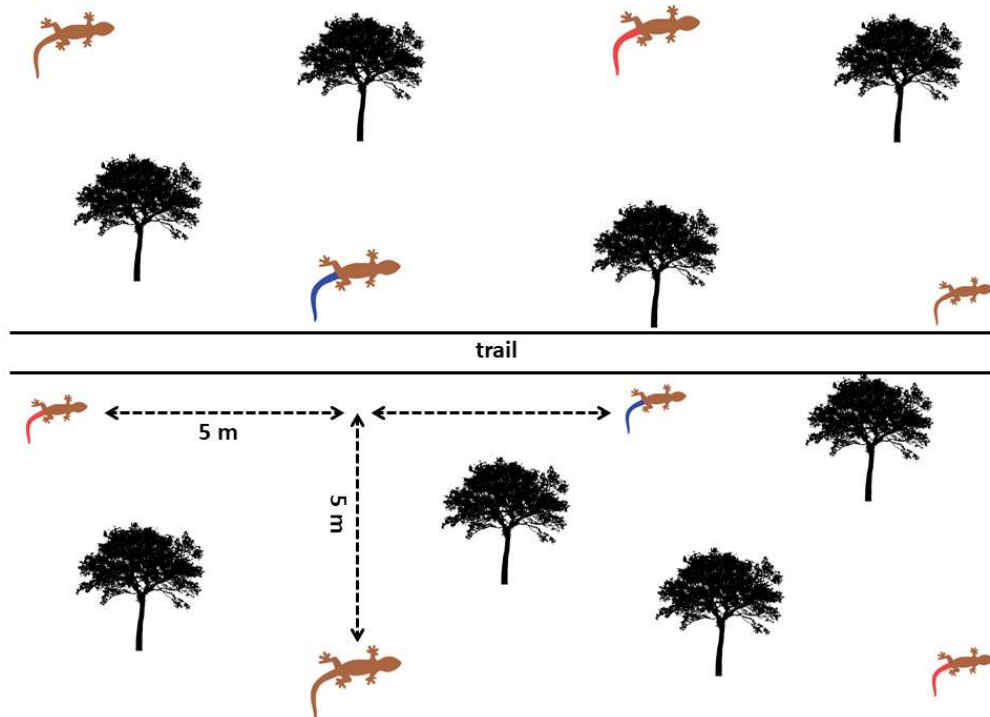

Figure S2. Schematic diagram showing how we placed our replicas along the experimental trail. Replicas of each treatment (color and size) were randomly allocated to each position.

## Supplementary material

Guidi, R.S., São-Pedro, V.A., Da Silva, H.R., Costa, G.C., Pessoa, D.M.A., 2021. The trade-off between color and size in lizards' conspicuous tails. Biorxiv - Animal Behavior and Cognition.

Table S1. Output from Pearson's chi-square analysis, with cross tabulation, concerning the distribution of predation events among treatments.

| Treatment          | Not attacked | Mammal | Bird        | Unidentified |
|--------------------|--------------|--------|-------------|--------------|
| <b>Small brown</b> |              |        |             |              |
| Observed counts    | 75           | 1      | 2           | 22           |
| Expected counts    | 62.8         | 2.8    | 5.3         | 29.0         |
| Adjusted values    | <b>2.8*</b>  | -1.2   | -1.6        | -1.7         |
| <b>Large brown</b> |              |        |             |              |
| Observed counts    | 63           | 3      | 2           | 32           |
| Expected counts    | 62.8         | 2.8    | 5.3         | 29.0         |
| Adjusted values    | 0.0          | 0.1    | -1.6        | 0.7          |
| <b>Small red</b>   |              |        |             |              |
| Observed counts    | 59           | 4      | 5           | 32           |
| Expected counts    | 62.8         | 2.8    | 5.3         | 29.0         |
| Adjusted values    | -0.9         | 0.8    | -0.2        | 0.7          |
| <b>Large red</b>   |              |        |             |              |
| Observed counts    | 61           | 3      | 12          | 24           |
| Expected counts    | 62.8         | 2.8    | 5.3         | 29.0         |
| Adjusted values    | -0.4         | 0.1    | <b>3.3*</b> | -1.2         |
| <b>Small blue</b>  |              |        |             |              |
| Observed counts    | 65           | 3      | 6           | 26           |
| Expected counts    | 62.8         | 2.8    | 5.3         | 29.0         |
| Adjusted values    | 0.5          | 0.1    | 0.3         | -0.7         |
| <b>Large blue</b>  |              |        |             |              |
| Observed counts    | 54           | 3      | 5           | 38           |
| Expected counts    | 62.8         | 2.8    | 5.3         | 29.0         |
| Adjusted values    | -2.0         | 0.1    | -0.2        | <b>2.2*</b>  |
| <b>Total</b>       |              |        |             |              |
| Observed counts    | 377          | 17     | 32          | 174          |

\*Adjusted values that exceeded the limit of two (2.0) were considered as statistically significant.

## Supplementary material

Guidi, R.S., São-Pedro, V.A., Da Silva, H.R., Costa, G.C., Pessoa, D.M.A., 2021. The trade-off between color and size in lizards' conspicuous tails. Biorxiv - Animal Behavior and Cognition.

Table S2. Output from generalized linear mixed-effects models.

| Predictors                   | All Predators |       | Mammals and Birds |       | Mammals     |       | Birds       |       |
|------------------------------|---------------|-------|-------------------|-------|-------------|-------|-------------|-------|
|                              | Odds Ratios   | p     | Odds Ratios       | p     | Odds Ratios | p     | Odds Ratios | p     |
| (Intercept)                  | 0.45          | 0.006 | 0.43              | 0.220 | 0.50        | 0.571 | 0.40        | 0.273 |
| Color [brown]                | 1.62          | 0.239 | 4.67              | 0.164 | >10         | 1.000 | 1.25        | 0.880 |
| Color [red]                  | 1.36          | 0.471 | 1.48              | 0.639 | 1.00        | 1.000 | 1.67        | 0.605 |
| Size [small]                 | 1.12          | 0.800 | 2.33              | 0.346 | 8.00        | 0.210 | 1.00        | 1.000 |
| Color [brown] * Size [small] | 0.76          | 0.671 | 0.11              | 0.202 | 0.10        | 1.000 | 0.00        | 1.000 |
| Color [red] * Size [small]   | 0.60          | 0.404 | 0.34              | 0.361 | 0.08        | 0.293 | 0.90        | 0.944 |
| Observations                 | 278           |       | 61                |       | 19          |       | 42          |       |
